# Supplementary material
Source: PubMed Central journal article supplement (PMC4715879)
Supplement: NIHMS714571-supplement-Supp_TableS1-S2___FigureS1-S6.pdf [file NIHMS714571-supplement-Supp_TableS1-S2___FigureS1-S6.pdf]

## Supplemental Material

**Table S1.** Bacterial strains and plasmids used in this study.

| Strain or plasmid                            | Description                                                                                                                                                                                      | Reference                                  |
|----------------------------------------------|--------------------------------------------------------------------------------------------------------------------------------------------------------------------------------------------------|--------------------------------------------|
| <b>Strains</b>                               |                                                                                                                                                                                                  |                                            |
| <b><i>E. coli</i></b>                        |                                                                                                                                                                                                  |                                            |
| XL1 Blue                                     | <i>recA1 endA1 gyrA96 thi-1 hsdR17 supE44 relA1 lac</i> [F' <i>proAB lacIqZΔM15::Tn10</i> (Tet <sup>r</sup> )]                                                                                   | Stratagene                                 |
| W3110                                        | Wild-type, F <sup>-</sup> <i>rph-1 INV(rrnD, rrnE)1 rph-1</i>                                                                                                                                    | <i>E. coli</i> Genetic Stock Center (Yale) |
| W3110Δ <i>eptA</i> (CH030)                   | W3110, Δ <i>eptA</i>                                                                                                                                                                             | (Herrera <i>et al.</i> , 2010)             |
| BN2                                          | K-12 BW25113, Δ <i>pagP</i> , Δ <i>lpxT</i> , Δ <i>eptA</i> , Δ <i>lpxM</i>                                                                                                                      | (Needham <i>et al.</i> , 2013)             |
| SM10                                         | <i>thi-1 thr leu tonA lacY supE recA::RP4-2-Tc::Mu</i> (Kan <sup>r</sup> )                                                                                                                       | (de Lorenzo and Timmis, 1994)              |
| <b><i>P. aeruginosa</i></b>                  |                                                                                                                                                                                                  |                                            |
| PA14                                         | Wild-type, UCBPP-PA14                                                                                                                                                                            | (Liberati <i>et al.</i> , 2006)            |
| PA14Δ <i>eptA</i> <sub>Pa</sub>              | PA14, Δ <i>eptA</i> <sub>Pa</sub>                                                                                                                                                                | This study                                 |
| PA14Δ <i>colR</i>                            | PA14, Δ <i>colR</i>                                                                                                                                                                              | This study                                 |
| PA14Δ <i>colS</i>                            | PA14, Δ <i>colS</i>                                                                                                                                                                              | This study                                 |
| <b>Plasmids</b>                              |                                                                                                                                                                                                  |                                            |
| pACYC184                                     | Low copy-number cloning vector, tet <sup>R</sup> , cam <sup>R</sup>                                                                                                                              | Novagen                                    |
| pPA14_58610                                  | pACYC184 containing PA14_58610 coding sequence and RBS                                                                                                                                           | This study                                 |
| pPA14_21210                                  | pACYC184 containing PA14_21210 coding sequence and RBS                                                                                                                                           | This study                                 |
| pPA14_39020 (pAC <i>eptA</i> <sub>Pa</sub> ) | pACYC184 containing PA14_39020 ( <i>eptA</i> <sub>Pa</sub> ) coding sequence and RBS                                                                                                             | This study                                 |
| pWSK29                                       | Low copy vector, T7 and T3 RNA polymerase promoters, ampicillin resistance                                                                                                                       | (Wang and Kushner, 1991)                   |
| p <i>lpxE</i> <sub>Fn</sub>                  | pWSK29 containing <i>F. novicida lpxE</i>                                                                                                                                                        | (Wang <i>et al.</i> , 2004)                |
| p <i>lpxF</i> <sub>Fn</sub>                  | pWSK29 containing <i>F. novicida lpxF</i>                                                                                                                                                        | (Wang <i>et al.</i> , 2006)                |
| pEX1.8                                       | Medium copy-number cloning vector, pEX1 carrying <i>ori</i> ( <i>P. aeruginosa</i> ) as 1.8-kb (Pearson <i>et al.</i> , 1997)(8)(7)(6)(5) <i>Pst</i> I fragment from pRO1614 in <i>Styl</i> site | (Pearson <i>et al.</i> , 1997)             |
| p <i>eptA</i> <sub>Pa</sub>                  | pEX1.8 containing <i>eptA</i> <sub>Pa</sub> coding sequence and RBS                                                                                                                              | This study                                 |
| p <i>eptA</i> <sub>nprom</sub>               | pEX1.8 containing <i>eptA</i> <sub>Pa</sub> coding sequence and native promoter                                                                                                                  | This study                                 |

| <b>Strain or plasmid</b>     | <b>Description</b>                                                                                                      | <b>Reference</b>             |
|------------------------------|-------------------------------------------------------------------------------------------------------------------------|------------------------------|
| <i>ppmrA</i>                 | pEX1.8 containing <i>pmrA</i> coding sequence and RBS                                                                   | This study                   |
| <i>pphoP</i>                 | pEX1.8 containing <i>phoP</i> coding sequence and RBS                                                                   | This study                   |
| <i>pcolR</i>                 | pEX1.8 containing <i>colR</i> coding sequence and RBS                                                                   | This study                   |
| <i>pcolR<sub>nprom</sub></i> | pEX1.8 containing <i>colR</i> coding sequence and native <i>colRS</i> promoter                                          | This study                   |
| <i>pcolS<sub>nprom</sub></i> | pEX1.8 containing <i>colS</i> coding sequence and native <i>colRS</i> promoter                                          | This study                   |
| pEX18Gm                      | Suicide (gene replacement) vector, <i>oriT</i> <sup>+</sup> <i>sacB</i> <sup>+</sup> , pUC18 MCS, gentamycin resistance | (Hoang <i>et al.</i> , 1998) |
| pEX18Gm: <i>eptA</i> del     | pEX18Gm containing assembly PCR product of 1Kb upstream and downstream flanking regions of <i>eptA</i> coding sequence  | This study                   |
| pEX18Gm: <i>colR</i> del     | pEX18Gm containing assembly PCR product of 1Kb upstream and downstream flanking regions of <i>colR</i> coding sequence  | This study                   |
| pEX18Gm: <i>colS</i> del     | pEX18Gm containing assembly PCR product of 1Kb upstream and downstream flanking regions of <i>colS</i> coding sequence  | This study                   |

**Table S2. Oligonucleotides used in this study.**

| <b>Primer</b> | <b>Sequence (5'-3')</b>              | <b>Application</b>                                                                 |
|---------------|--------------------------------------|------------------------------------------------------------------------------------|
| 5' PA14_58610 | GCGATATCCCATCGAACGAGGCTA<br>TCGTGTC  | Used to clone PA14_58610 and native RBS into pACYC184                              |
| 3' PA14_58610 | CGCGGATCCGCGTCAGCCTTCGTT<br>CGGCTG   |                                                                                    |
| 5' PA14_21210 | CGAGCGATATCTCAGGAGTTGCTT<br>CAATGGGT | Used to clone PA14_21210 and native RBS into pACYC184                              |
| 3' PA14_21210 | CGCGGATCCTCACTGGGCTGCCCT<br>GGG      |                                                                                    |
| 5' PA14_39020 | CGAGCGATATCCAGTGAAGATCCG<br>TGCCCATG | Used to clone PA14_39020 ( <i>eptA<sub>Pa</sub></i> ) and native RBS into pACYC184 |
| 3' PA14_39020 | CGATGTCTGACTCAGGAAGCCGGC             |                                                                                    |

| <b>Primer</b>                      | <b>Sequence (5'-3')</b>                           | <b>Application</b>                                                                                                           |
|------------------------------------|---------------------------------------------------|------------------------------------------------------------------------------------------------------------------------------|
|                                    | GGCTCCT                                           |                                                                                                                              |
| 5' PA <i>eptA</i>                  | CGAGCGAATTCCAGTGAAGATCCG<br>TGCCCATG              | Used to clone <i>eptA</i> <sub>Pa</sub> into pEX1.8                                                                          |
| 3' PA <i>eptA</i>                  | CGATAAGCTTTCAGGAAGCCGGCG<br>GCTCCT                |                                                                                                                              |
| 5' <i>eptA</i> outdel              | GAGAGCTCGAAGCGTCCGACGGT<br>GTCCAG                 | Used to clone upstream <i>eptA</i> <sub>Pa</sub> flanking region and for assembly PCR to generate pEX18Gm: <i>eptA</i> del   |
| 3' <i>eptA</i> outdel              | GAGGATCCGTCCCGATGAACCACC<br>CGCA                  | Used to clone downstream <i>eptA</i> <sub>Pa</sub> flanking region and for assembly PCR to generate pEX18Gm: <i>eptA</i> del |
| 5' <i>eptA</i> indel               | GATCCGTGCCCATGTGCGAAAGCCG<br>AGGAAGCGTCTGGCCAGGAG | Used to clone downstream <i>eptA</i> <sub>Pa</sub> flanking region                                                           |
| 3' <i>eptA</i> indel               | CTCCTGGCCAGACGCTTCCTCGGC<br>TTTCGACATGGGCACGGATC  | Used to clone upstream <i>eptA</i> <sub>Pa</sub> flanking region                                                             |
| 5' PA <i>eptA</i> <sub>nprom</sub> | ACGCGTCGACGAAATTCACAGAAG<br>GTTTTCCCG             | Used to clone <i>eptA</i> <sub>Pa</sub> and native promoter (nprom) into pEX1.8                                              |
| 3' PA <i>eptA</i> <sub>nprom</sub> | CAAGACGTGCGACTCGCCGGGTCTG<br>TATCAGGAA            |                                                                                                                              |
| 5' PA <i>pmrA</i>                  | CGGAATTCATGAGAATACTGCTGG<br>CCGAGGACGACCT         | Used to clone <i>pmrA</i> into pEX1.8                                                                                        |
| 3' PA <i>pmrA</i>                  | CCCAAGCTTTCAGGGCGCCGGCT<br>GGTC                   |                                                                                                                              |
| 5' PA <i>phoP</i>                  | CGGAATTCATGAAACTGCTGGTAG<br>TGGAAGACGAGG          | Used to clone <i>phoP</i> into pEX1.8                                                                                        |
| 3' PA <i>phoP</i>                  | CCCAAGCTTTCACCGGCAGCGCTC<br>GGTG                  |                                                                                                                              |
| 5' PA <i>colR</i>                  | CGGAATTCATGCGAATACTGGTGG<br>TCGAAG                | Used to clone <i>colR</i> into pEX1.8                                                                                        |
| 3' PA <i>colR</i>                  | CCCAAGCTTTTATACTCCATTCGGC<br>TCCTCC               |                                                                                                                              |
| 5' <i>colR</i> outdel              | GTTCTACATGAAGGTGCCCATCGA<br>GTTCCGG               | Used to clone upstream <i>colR</i> flanking region and for assembly PCR to generate pEX18Gm: <i>colR</i> del                 |
| 3' <i>colR</i> outdel              | CGCAGCAGTGGCGCGTTGAACTG                           | Used to clone downstream <i>colR</i> flanking region and for assembly PCR to generate pEX18Gm: <i>colR</i> del               |
| 5' <i>colR</i> indel               | GGACATGCGAATACTGGTGGAGCC                          | Used to clone downstream                                                                                                     |

| <b>Primer</b>                     | <b>Sequence (5'-3')</b>                      | <b>Application</b>                                                                                             |
|-----------------------------------|----------------------------------------------|----------------------------------------------------------------------------------------------------------------|
|                                   | GAATGGAGTATAAGC                              | <i>colR</i> flanking region                                                                                    |
| 3' <i>colR</i> indel              | GCTTATACTCCATTCGGCTCCACC<br>AGTATTCGCATGTCC  | Used to clone upstream <i>colR</i> flanking region                                                             |
| 5' <i>colS</i> outdel             | CGGAATTCCGAGGAACAGCCAGG<br>GGTTGAATGGAC      | Used to clone upstream <i>colS</i> flanking region and for assembly PCR to generate pEX18Gm: <i>colS</i> del   |
| 3' <i>colS</i> outdel             | CGGGATCCCACGCGAATACCAAGC<br>GACTCGAAGGC      | Used to clone downstream <i>colS</i> flanking region and for assembly PCR to generate pEX18Gm: <i>colS</i> del |
| 5' <i>colS</i> indel              | GAGGAGCCGAATGGAGTATAAGCT<br>CGATGTTGCTTGACGA | Used to clone downstream <i>colS</i> flanking region                                                           |
| 3' <i>colS</i> indel              | TCGTCAAGCAACATCGAGCTTATA<br>CTCCATTCGGCTCCTC | Used to clone upstream <i>colS</i> flanking region                                                             |
| 5' <i>PAcoIR</i> <sub>nprom</sub> | ACGCGTCGACCGATCACCAGTTGC<br>TTGAC            | Used to clone <i>colR</i> and native promoter (nprom) into pEX1.8                                              |
| 3' <i>PAcoIR</i> <sub>nprom</sub> | GAGGAGCCGAATGGAGTATAAAAG<br>CTTGC            |                                                                                                                |
| 5' <i>PAcoIS</i> <sub>nprom</sub> | CGCGGATCCCGATCACCAGTTGCT<br>TGAC             | Used to clone <i>colRS</i> native promoter (nprom) into pEX1.8                                                 |
| 3' <i>PAcoIS</i> <sub>nprom</sub> | GCGAATTCGTCCCACTCCTTCGCA<br>GGA              |                                                                                                                |
| 5' <i>PAcoIS</i>                  | GCGAATTCATGGAGTATAAGCAGA<br>GCCTCGC          | Used to clone <i>colS</i> into pEX1.8                                                                          |
| 3' <i>PAcoIS</i>                  | GGAAGCTTTCAAGCAACATCGAGT<br>AAACTTCGAACC     |                                                                                                                |
| 5' <i>qclpX</i>                   | AAGAAGGTTCTGGCGGTAGC                         | qPCR analysis of <i>clpX</i>                                                                                   |
| 3' <i>qclpX</i>                   | ATGTTCTCGACATCCTCGCC                         | transcription                                                                                                  |
| 5' <i>qeptA</i>                   | TGCCCTGCATGTTCTCCAAC                         | qPCR analysis of <i>eptA</i>                                                                                   |
| 3' <i>qeptA</i>                   | GATCCTTGCTCTCGCTCAGG                         | transcription                                                                                                  |
| 5' <i>qarnT</i>                   | GGCTATGCCAACCTCGACCC                         | qPCR analysis of <i>arnT</i>                                                                                   |
| 3' <i>qarnT</i>                   | GCGAGGAAGCCCTTGGTGTCAG                       | transcription                                                                                                  |

## References:

Herrera, C.M., Hankins, J.V., and Trent, M.S. (2010) Activation of PmrA inhibits LpxT-dependent phosphorylation of lipid A promoting resistance to antimicrobial peptides. *Mol Microbiol* **76**: 1444–1460.

Hoang, T.T., Karkhoff-Schweizer, R.R., Kutchma, A.J., and Schweizer, H.P. (1998) A broad-host-range Flp-FRT recombination system for site-specific excision of

chromosomally-located DNA sequences: application for isolation of unmarked *Pseudomonas aeruginosa* mutants. *Gene* **212**: 77–86.

Liberati, N.T., Urbach, J.M., Miyata, S., Lee, D.G., Drenkard, E., Wu, G., *et al.* (2006) An ordered, nonredundant library of *Pseudomonas aeruginosa* strain PA14 transposon insertion mutants. *Proc Natl Acad Sci U S A* **103**: 2833–2838.

Lorenzo, V. de, and Timmis, K.N. (1994) Analysis and construction of stable phenotypes in gram-negative bacteria with Tn5- and Tn10-derived minitransposons. *Methods Enzymol* **235**: 386–405.

Needham, B.D., Carroll, S.M., Giles, D.K., Georgiou, G., Whiteley, M., and Trent, M.S. (2013) Modulating the innate immune response by combinatorial engineering of endotoxin. *Proc Natl Acad Sci* **110**: 1464–1469.

Pearson, J.P., Pesci, E.C., and Iglewski, B.H. (1997) Roles of *Pseudomonas aeruginosa* las and rhl quorum-sensing systems in control of elastase and rhamnolipid biosynthesis genes. *J Bacteriol* **179**: 5756–5767.

Wang, R.F., and Kushner, S.R. (1991) Construction of versatile low-copy-number vectors for cloning, sequencing and gene expression in *Escherichia coli*. *Gene* **100**: 195–199.

Wang, X., Karbarz, M.J., McGrath, S.C., Cotter, R.J., and Raetz, C.R.H. (2004) MsbA Transporter-dependent Lipid A 1-Dephosphorylation on the Periplasmic Surface of the Inner Membrane: TOPOGRAPHY OF FRANCISELLA NOVICIDA LpxE EXPRESSED IN ESCHERICHIA COLI. *J Biol Chem* **279**: 49470–49478.

Wang, X., McGrath, S.C., Cotter, R.J., and Raetz, C.R.H. (2006) Expression cloning and periplasmic orientation of the *Francisella novicida* lipid A 4'-phosphatase LpxF. *J Biol Chem* **281**: 9321–9330.

Supplemental Figures:

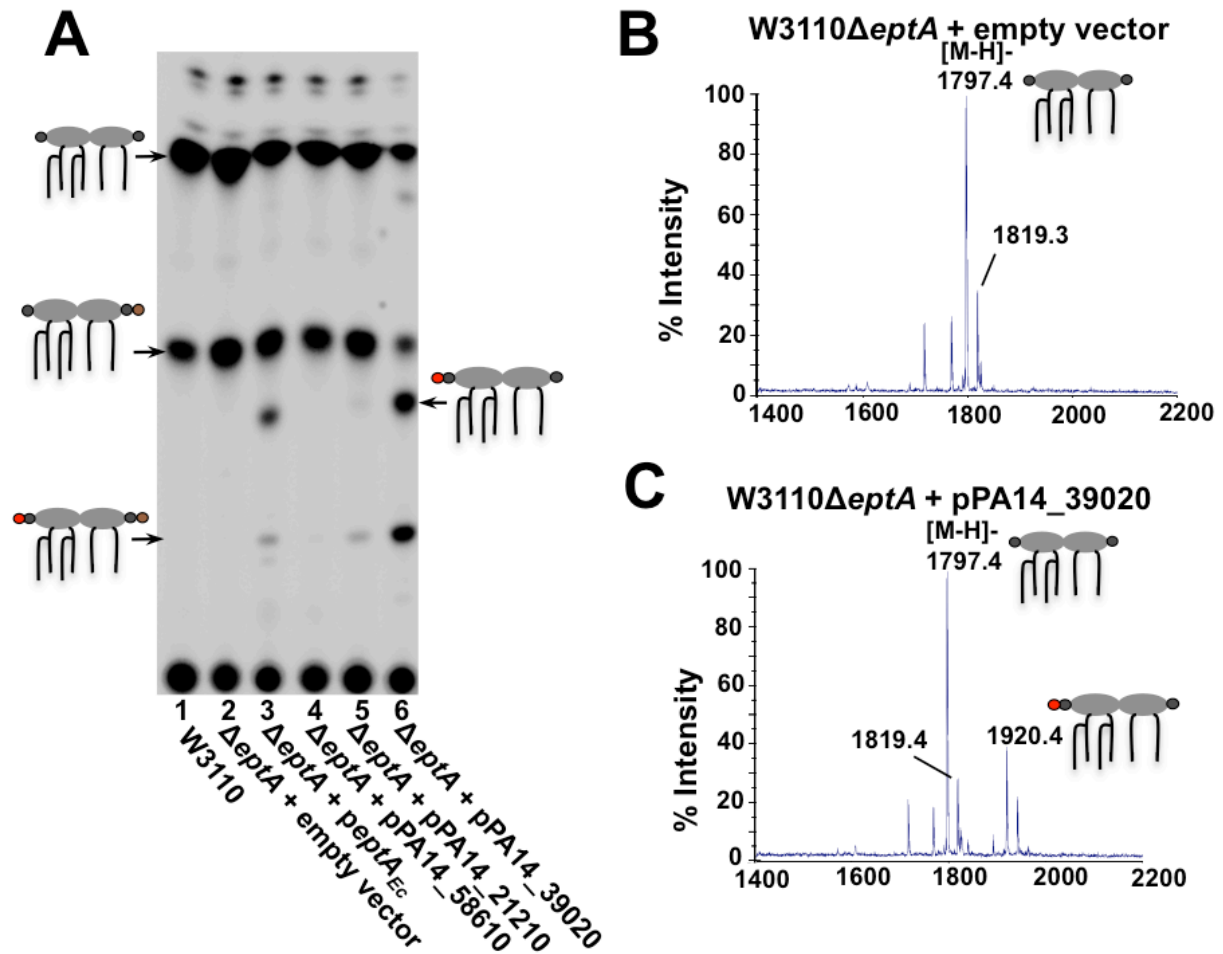

**Fig S1.** Identification of a functional *P. aeruginosa* pEtN transferase (*eptA*<sub>Pa</sub>) in *E. coli*. A) *P. aeruginosa* *eptA* orthologs were heterologously expressed in K-12 *E. coli* strain W3110 $\Delta$ *eptA*. PA14\_39020 and *eptA*<sub>Ec</sub> were able to modify lipid A. B) MALDI-TOF MS analysis of lipid A isolated from  $\Delta$ *eptA* + empty vector shows no pEtN addition to lipid A, while (C) expression of PA14\_39020 reveals pEtN modification.

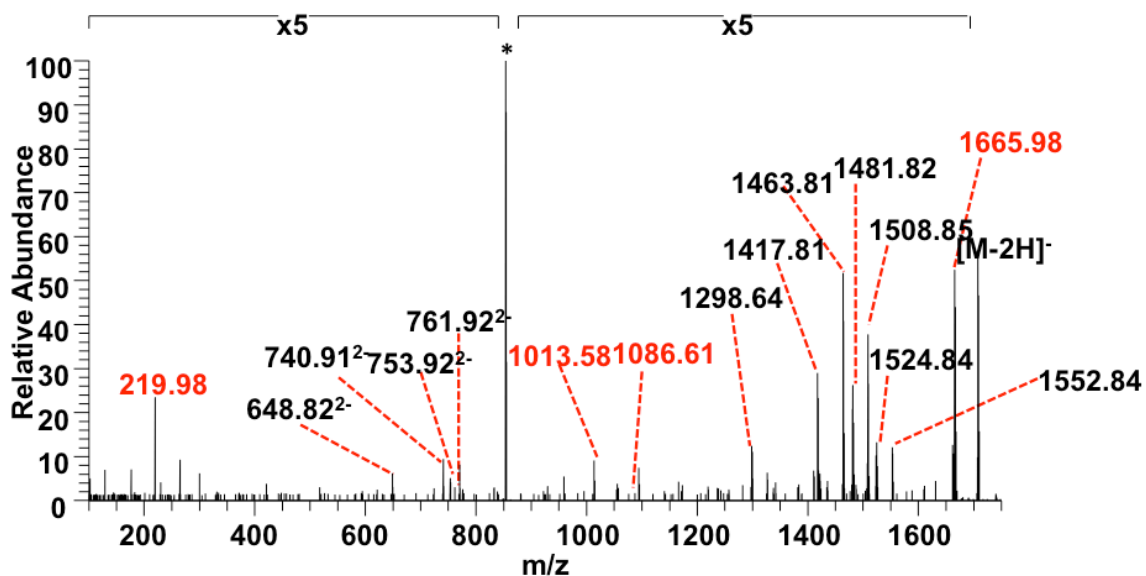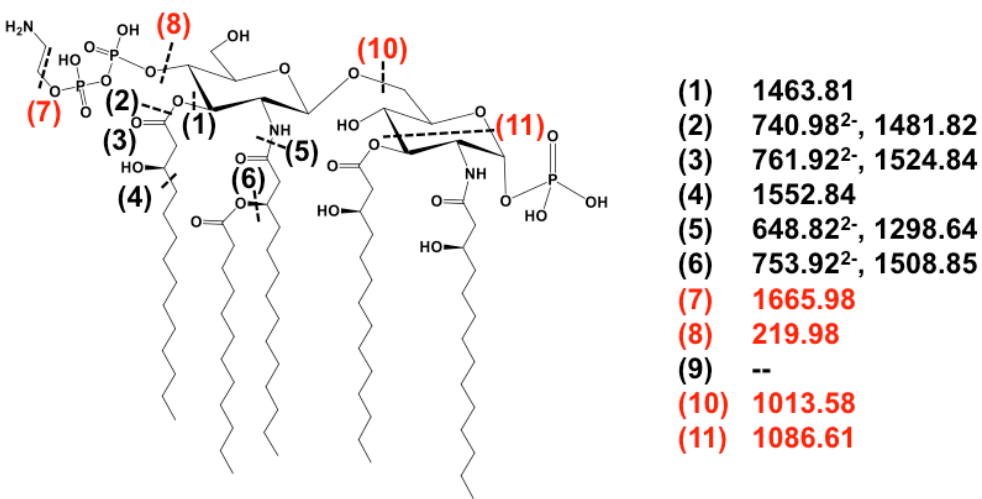

**Fig S2.** UVPD mass spectrum and fragmentation map of doubly deprotonated lipid A prepared from BN2 + *peptA*<sub>Pa</sub> [ $M_r = 1710.03$ ]. Key fragments and cleavage sites that support the identification and location of the 4' modification are shown in red font. The precursor ion is marked with an asterisk.

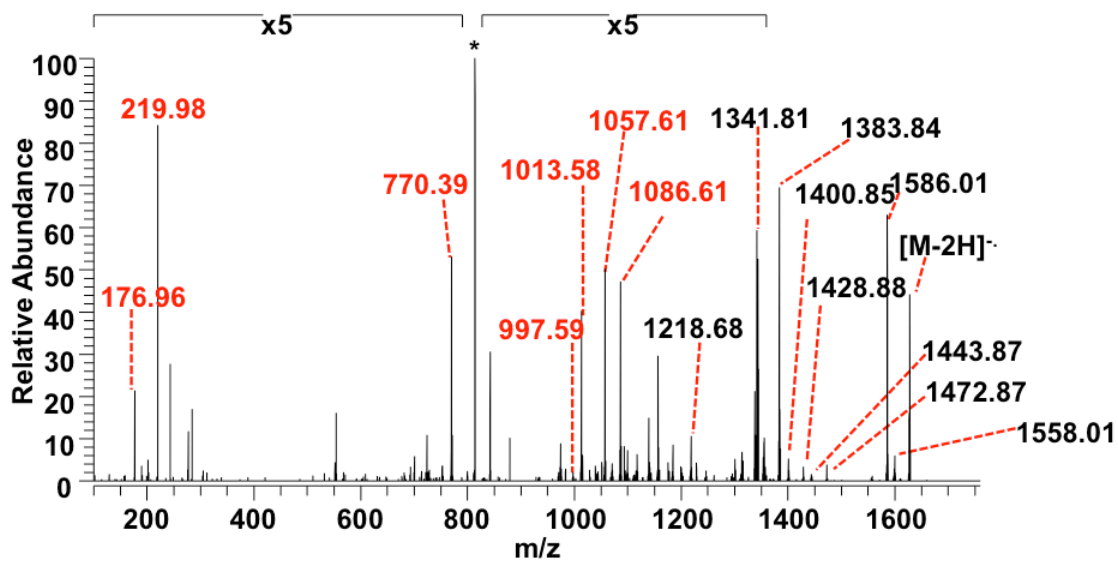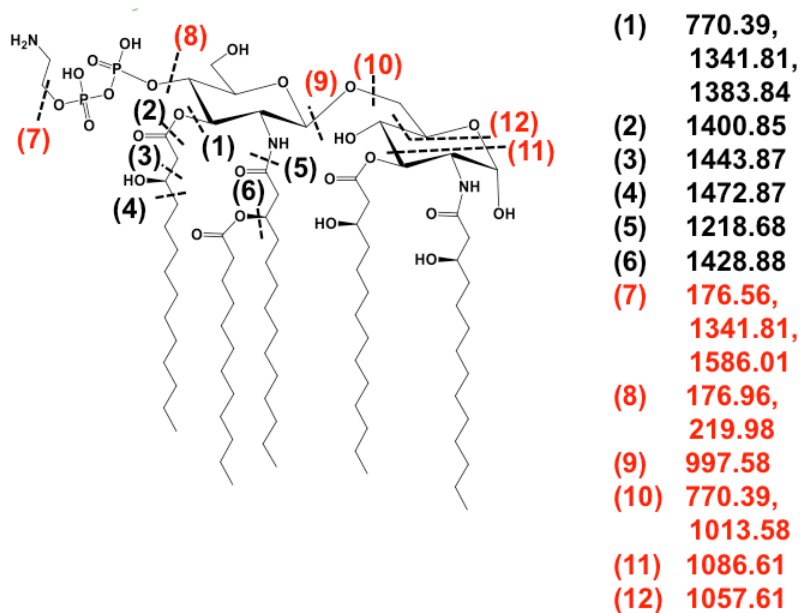

**Fig S3.** UVPD mass spectrum and fragmentation map of doubly deprotonated lipid A prepared from BN2 + *peptA*<sub>Pa</sub> + *p/pxE* [ $M_r = 1630.06$ ]. Key fragments and cleavage sites that support the identification and location of the 4' modification are shown in red font. The precursor ion is marked with an asterisk.



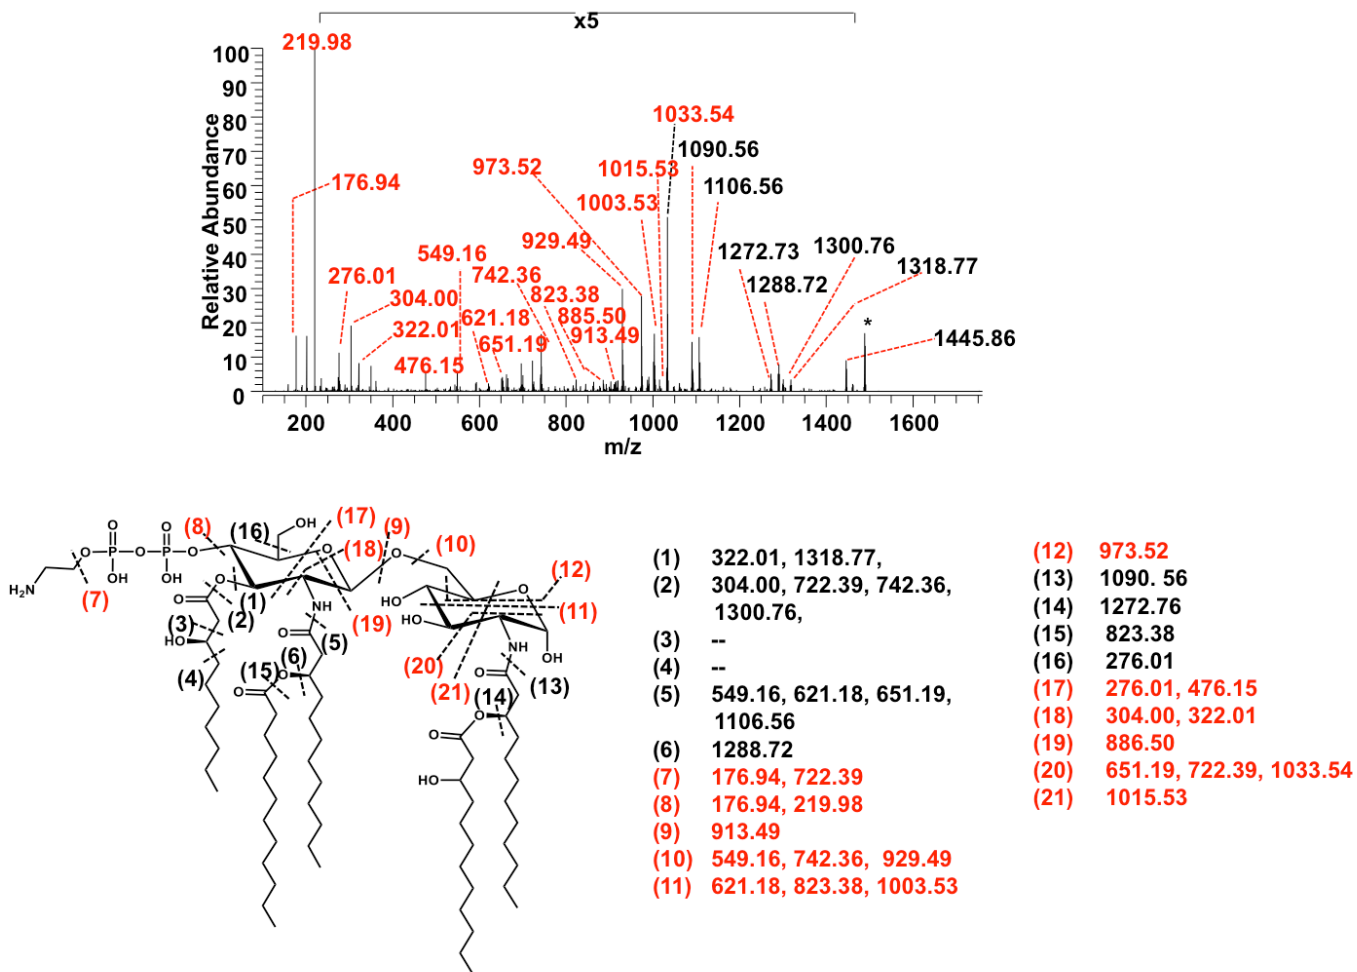

**Fig S4.** UVPD mass spectrum and fragmentation map of singly deprotonated lipid A prepared from PA14 + peptAPa [ $M_r = 1489.91$ ]. Key fragments and cleavage sites that support the identification and location of the 4' modification are shown in red font. The precursor ion is marked with an asterisk.

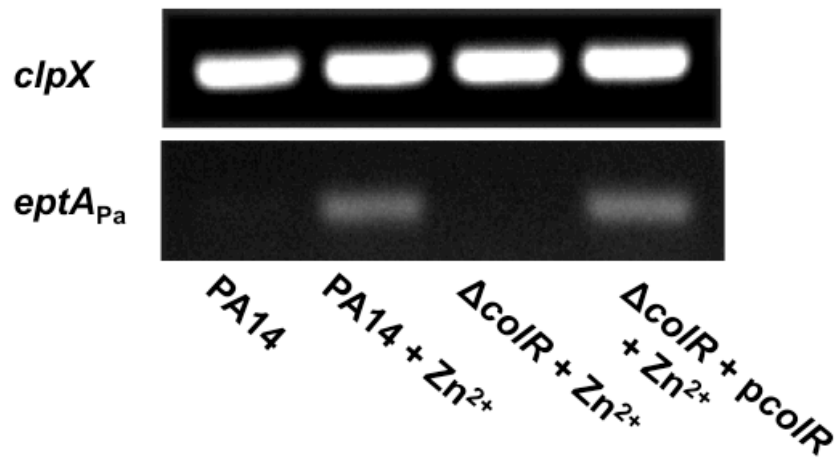

**Fig S5.** Excess zinc induces transcription of *eptA<sub>Pa</sub>*. Semi-quantitative RT-PCR shows no detectable *eptA<sub>Pa</sub>* transcription in PA14 cells grown in LB alone, while addition of 1mM ZnSO<sub>4</sub> results in detectable transcription. No transcription of *eptA<sub>Pa</sub>* is visualized in PA14Δ*colR* grown in LB with 1mM ZnSO<sub>4</sub>. When this mutant is complemented, *eptA<sub>Pa</sub>* transcription in response to 1mM ZnSO<sub>4</sub> can once again be seen. The stably expressed housekeeping gene *clpX* was used as a control.

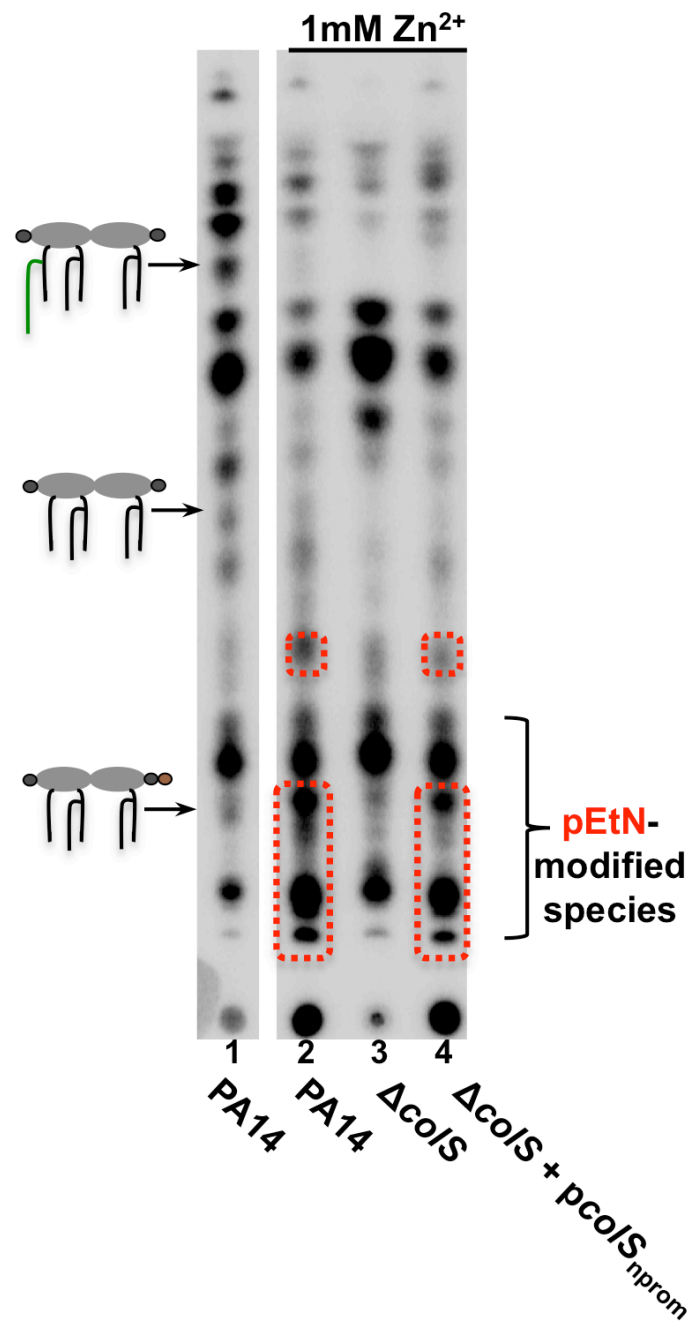

**Fig S6.** Deletion of *colS* results in loss of Zn<sup>2+</sup>-induced pEtN modification of *P. aeruginosa* lipid A. Lipid A was isolated from <sup>32</sup>P-labeled cells grown in LB broth and separated by TLC. Lipid A species modified with pEtN were observed in PA14 supplemented with 1mM ZnSO<sub>4</sub> (lane 2). Deletion of *colS* resulted in no pEtN modification of lipid A in response to Zn<sup>2+</sup> (lane 3). Modification is restored in the mutant complemented with *colS* (lane 4).
